# Supplementary material for: Differential binding cell-SELEX method to identify cell-specific aptamers using high-throughput sequencing
Source: bioRxiv or medRxiv preprint supplement (doi:10.1101/466722), 2019-05-14
Supplement: Supplementary file [file media-1.pdf]

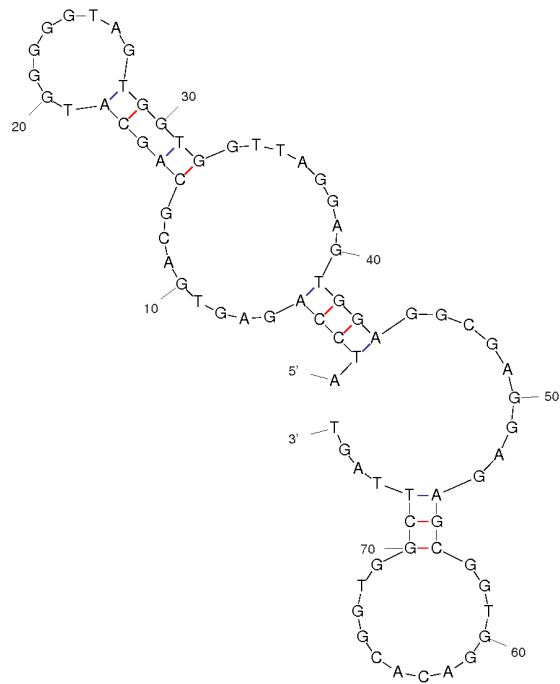

dG = -2.54 mb-3

### 1. Predicted structure for lead sequence MB-3

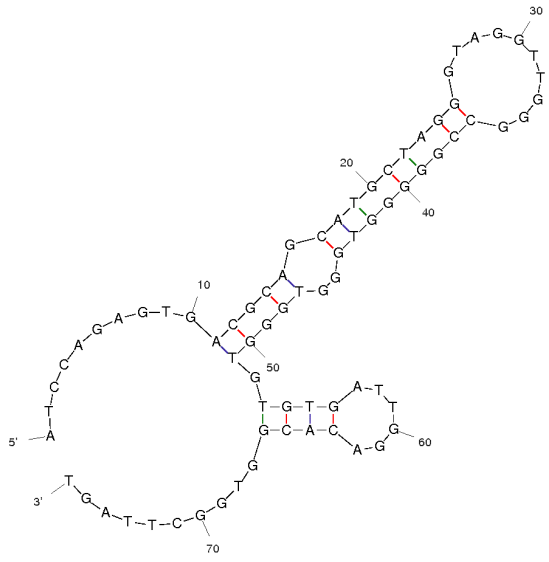

dG = -3.93 db-1

### 2. Predicted structure for lead sequence DB-1

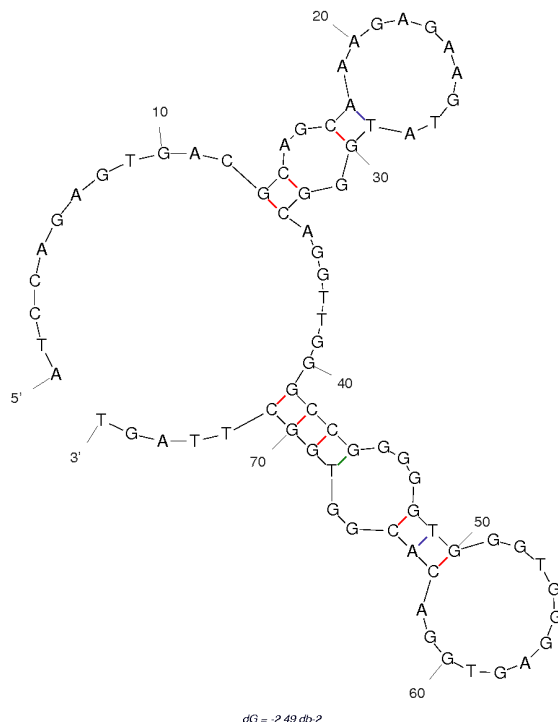

3. Predicted structure for lead sequence DB-2

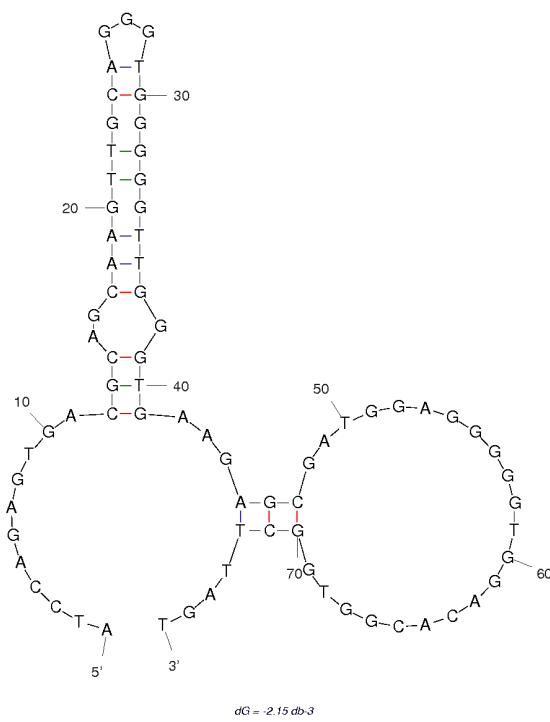

4. Predicted structure for lead sequence DB-3

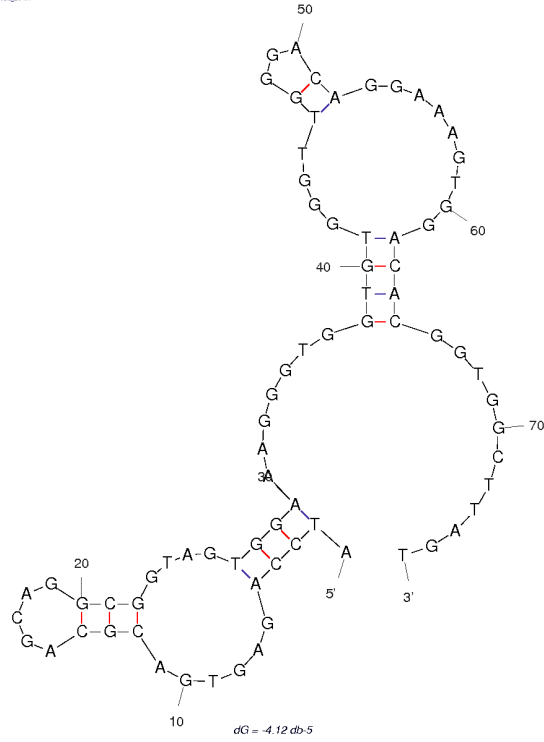

### 5. Predicted structure for lead sequence DB-5

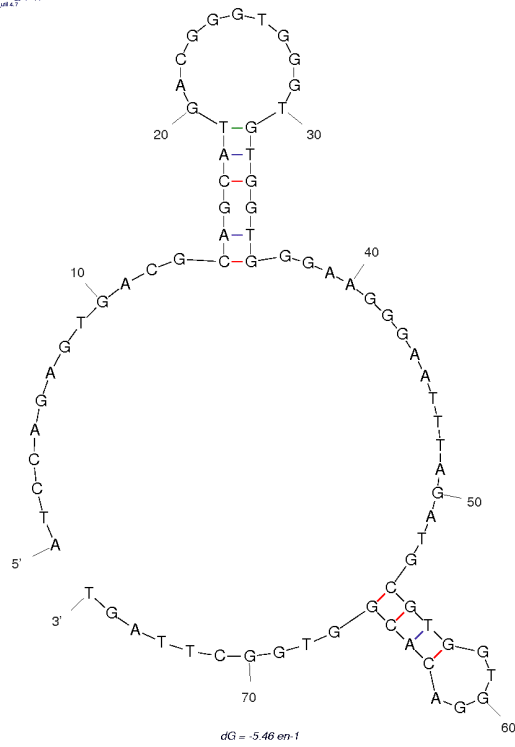

### 6. Predicted structure for lead sequence EN-1

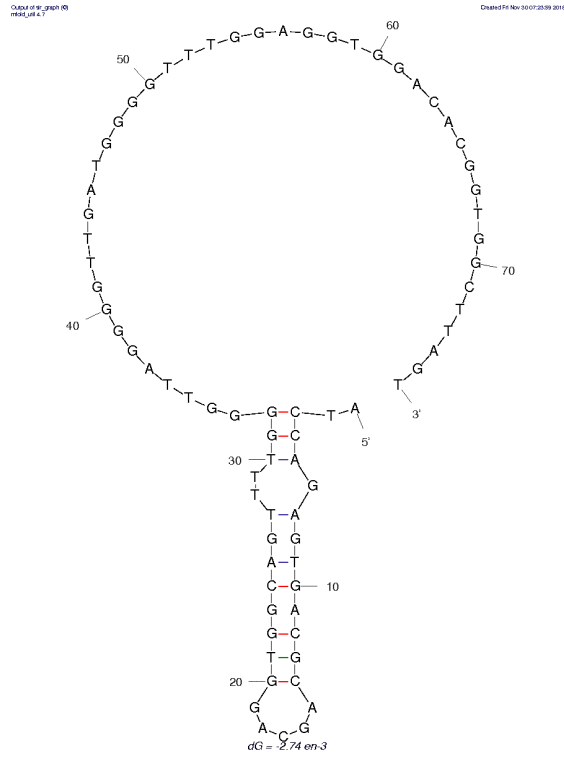

## 7. Predicted structure for lead sequence EN-3

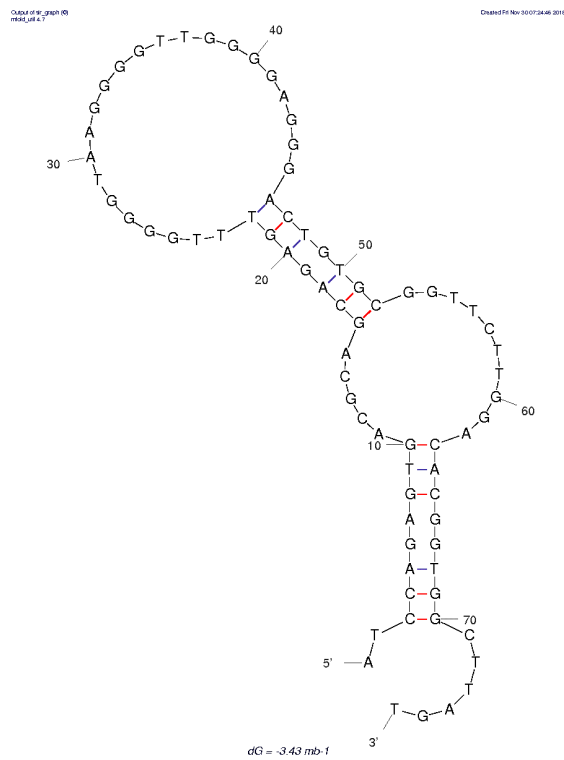

## 8. Predicted structure for lead sequence MB-1

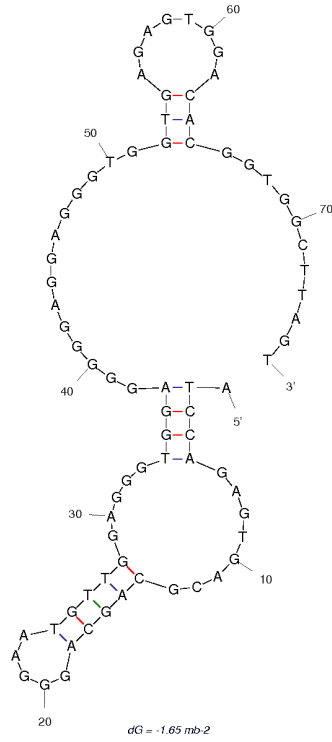

### 9. Predicted structure for lead sequence MB-2
